# Supplementary material for: Correlation between Soluble α-Klotho and Renal Function in Patients with Chronic Kidney Disease: A Review and Meta-Analysis
Source: Biomed Res Int. 2018 Aug 12;2018:9481475. doi: 10.1155/2018/9481475 (PMC6109492; doi:10.1155/2018/9481475)
Supplement: Supplementary Materials — Figure 1. To detect the study bias, we conducted funnel plot of the publication bias for α-Klotho and eGFR group. The result is suggestive of an indistinctive small study bias. Supplementary Materials Figure 2. To test whether a study has a significant impact on the results, sensitivity estimates for α-Klotho and eGFR group with corresponding 95% CIs were conducted. In the sensitivity analysis, the pooled RR ranged from 0.32 (95%CI, 0.19~0.44) to 0.37 (95%CI, 0.26~0.48). No study had a significant impact on the total combined results. Supplementary Materials Figure 3. To detect the study bias, we conducted funnel plot of the publication bias for α-Klotho and FGF-23 group. The result is suggestive of an indistinctive small study bias. Supplementary Materials Figure 4. To test whether a study has a significant impact on the results, sensitivity estimates for α-Klotho and FGF-23 group with corresponding 95% CIs were conducted. In the sensitivity analysis, the pooled RR ranged from -0.13 (95%CI, -0.20~-0.06) to -0.07(95%CI, -0.17~-0.02). No study had a significant impact on the total combined results. Supplementary Materials Figure 5. To detect the study bias, we conducted funnel plot of the publication bias for α-Klotho and Ca group. The result is suggestive of an indistinctive small study bias. Supplementary Materials Figure 6. To test whether a study has a significant impact on the results, sensitivity estimates for α-Klotho and Ca group with corresponding 95% CIs were conducted. In the sensitivity analysis, the pooled RR ranged from 0.05 (95%CI, -0.03~0.13) to 0.16 (95%CI, 0.04~0.28). No study had a significant impact on the total combined results. Supplementary Materials Figure 7. To detect the study bias, we conducted funnel plot of the publication bias for α-Klotho and PTH group. The result is suggestive of an indistinctive small study bias. Supplementary Materials Figure 8. To test whether a study has a significant impact on the results, [file 9481475.f1.zip]

Archive with 12 entries (11 files):
- 9481475.f1/
- 9481475.f1/Supplementary Materials Figure 10_BMRI_2422677.emf
- 9481475.f1/Supplementary Materials Figure 1_BMRI_2422668.emf
- 9481475.f1/Supplementary Materials Figure 2_BMRI_2422669.emf
- 9481475.f1/Supplementary Materials Figure 3_BMRI_2422670.emf
- 9481475.f1/Supplementary Materials Figure 4_BMRI_2422671.emf
- 9481475.f1/Supplementary Materials Figure 5_BMRI_2422672.emf
- 9481475.f1/Supplementary Materials Figure 6_BMRI_2422673.emf
- 9481475.f1/Supplementary Materials Figure 7_BMRI_2422674.emf
- 9481475.f1/Supplementary Materials Figure 8_BMRI_2422675.emf
- 9481475.f1/Supplementary Materials Figure 9_BMRI_2422676.emf
- 9481475.f1/Supplementary Materials Table 1_BMRI_2422654.doc
